# Supplementary material for: Structural modifications to platinum(ii) pincer complexes resulting in changes in their vapochromic and solvatochromic properties
Source: Royal Society of Chemistry journal article supplement (doi:10.1039/d3fd00025g), 2023-01-01
Supplement: d3fd00025g1.pdf [file d3fd00025g1.pdf]

Supporting Information

## Structural Modifications to Platinum(II) Pincer Complexes Resulting in Changes in their Vapochromic and Solvatochromic Properties

Mathew J. Bryant, Sara Fuertes, Lauren E. Hatcher, Lynne H. Thomas and Paul R. Raithby

|                                                  | Page |
|--------------------------------------------------|------|
| Synthesis of Precursor Complexes                 | 2    |
| Chloro[acetyl 3,5-di(2-pyridyl)phenyl]platinum   | 2    |
| Chloro[ethyl 3,5-di(2-pyridyl)benzoato]platinum  | 2    |
| Chloro[phenyl 3,5-di(2-pyridyl)benzoato]platinum | 2    |
| Crystal structure data for <b>2'</b> (green)     | 3    |
| Crystal structure data for <b>2</b> (yellow)     | 10   |
| Crystal structure data for <b>3</b> (yellow)     | 17   |
| Figure S1                                        | 28   |
| Figure S2                                        | 28   |
| Figure S3                                        | 29   |
| Figure S4                                        | 29   |
| Figure S5                                        | 30   |
| Figure S6                                        | 31   |
| References                                       | 31   |
|                                                  |      |

## Synthesis of the Precursor Complexes

### Chloro[acetyl 3,5-di(2-pyridyl)phenyl]platinum

The synthesis was adapted from a literature procedure.<sup>1</sup>

To a stirred solution of acetyl 3,5-di(2-pyridyl)benzene (100 mg, 0.34 mmol) in acetonitrile (15 ml), a solution of  $K_2[PtCl_4]$  (144 mg, 0.34 mmol) in water (5 ml) was added, and the resulting orange mixture was refluxed at 100°C for 3 days.

This was then allowed to cool, resulting in a vivid yellow precipitate, which was retained in a filter and washed with water (20ml), ethanol (20 ml), acetonitrile (20ml), and  $Et_2O$  (10 ml). The bright yellow solid was then dried.

**Yield: 85mg, 50%**

**<sup>1</sup>H NMR** (400 MHz,  $CDCl_3$ )  $\delta_H$ : 9.38 (d,  $^3J_{H-H}=4.5$  Hz,  $^3J_{H-Pt}=38.7$  Hz, 2H, *ortho-Py*), 8.06 (s, 2H, *pincer-Ph*), 8.02 (t,  $^3J_{H-H}=7.0$  Hz, *para-Py*), 7.82 (d,  $^3J_{H-H}=6.9$  Hz, 2H, *meta-Py*), 7.35 (t, obscured by  $CDCl_3$  signal, *meta-Py*), 2.67 (s, 3H,  $COCH_3$ ) The NMR analysis consistent with literature.

### Chloro[ethyl 3,5-di(2-pyridyl)benzoato]platinum

The synthesis was adapted from a literature procedure.<sup>1</sup>

To a stirred solution of ethyl 3,5-di(2-pyridyl)benzoate (100 mg, 0.34 mmol) in acetonitrile (15 ml), a solution of  $K_2[PtCl_4]$  (144 mg, 0.34 mmol) in water (5 ml) was added, and the resulting orange mixture was refluxed at 100°C for 3 days.

This was then allowed to cool, resulting in a vivid yellow precipitate, which was retained in a filter and washed with water (20ml), ethanol (20 ml), acetonitrile (20ml), and  $Et_2O$  (10 ml). The bright yellow solid was then dried.

**Yield: 150mg, 85.5%**

**IR** ( $cm^{-1}$ ):  $\nu(C=O)$  1708

**<sup>1</sup>H NMR** (500 MHz,  $CDCl_3$ )  $\delta_H$ : 9.42 (d,  $^3J_{H-H}=5.5$  Hz,  $^3J_{H-Pt}=42.4$  Hz, 2H, *ortho-Py*), 8.20 (s, 2H, *pincer-Ph*), 8.04 (t,  $^3J_{H-H}=7.6$  Hz, 2H, *para-Py*), 7.86 (d,  $^3J_{H-H}=8.1$  Hz, 2H, *meta-Py*), 7.39 (t,  $^3J_{H-H}=6.77$  Hz, 2H, *meta-Py*), 4.46 (q,  $^3J_{H-H}=7.1$  Hz, 2H,  $CO_2CH_2$ ), 1.48 (t,  $^3J_{H-H}=7.1$  Hz, 3H,  $CO_2CH_2CH_3$ )

**Mass Spectrometry** (positive loop injection): Chloride lost upon ionisation. Measured (MeOH)  $m/z$  – 498.0792, Calculated for  $[C_{19}O_2N_2H_{15}Pt_1]^+$  – 498.078127. Correct isotope pattern.

### Chloro[phenyl 3,5-di(2-pyridyl)benzoato]platinum

The synthesis was adapted from a literature procedure.<sup>1</sup>

To a stirred solution of phenyl 3,5-di(2-pyridyl)benzoate (100 mg, 0.34 mmol) in acetonitrile (15 ml), a solution of  $K_2[PtCl_4]$  (144 mg, 0.34 mmol) in water (5 ml) was added, and the resulting orange mixture was refluxed at 100°C for 3 days.

This was then allowed to cool, resulting in a vivid yellow precipitate, which was retained in a filter and washed with water (20ml), ethanol (20 ml), acetonitrile (20ml), and  $Et_2O$  (10 ml). The bright yellow solid was then dried.

**Yield: 150mg, 85.5%**

**IR** ( $cm^{-1}$ ):  $\nu(C=O)$  1708

**<sup>1</sup>H NMR** (500 MHz,  $CDCl_3$ )  $\delta_H$ : 9.45 (d,  $^3J_{H-H}=5.5$  Hz,  $^3J_{H-Pt}=41.9$  Hz, 2H, *ortho-Py*), 8.34 (s, 2H, *pincer-Ph*), 8.06 (t,  $^3J_{H-H}=7.6$  Hz, 2H, *para-Py*), 7.89 (d,  $^3J_{H-H}=8.1$  Hz, 2H, *meta-Py*), 7.50 (m, 3H, *ortho+para-pendant Ph*), 7.42 (t,  $^3J_{H-H}=7.2$  Hz, 2H, *meta-Py*), 7.34 (t,  $^3J_{H-H}=7.4$  Hz, 2H, *meta-pendant Ph*)

**Mass Spectrometry** (positive loop injection): Chloride lost upon ionisation. Measured (MeOH)  $m/z$  – 546.0806, Calculated for  $[C_{23}O_2N_2H_{15}Pt_1]^+$  – 546.078127. Correct isotope pattern.

**Crystallographic Data****Data for 2a' (green)****Table S1 Crystal data and structure refinement for 2' \_green.**

|                                             |                                                                  |
|---------------------------------------------|------------------------------------------------------------------|
| Identification code                         | 2_green                                                          |
| Empirical formula                           | C <sub>19</sub> H <sub>13</sub> N <sub>3</sub> O <sub>8</sub> Pt |
| Formula weight                              | 606.41                                                           |
| Temperature/K                               | 150.15                                                           |
| Crystal system                              | orthorhombic                                                     |
| Space group                                 | Ibam                                                             |
| a/Å                                         | 35.828(2)                                                        |
| b/Å                                         | 18.4081(9)                                                       |
| c/Å                                         | 6.6356(3)                                                        |
| α/°                                         | 90                                                               |
| β/°                                         | 90                                                               |
| γ/°                                         | 90                                                               |
| Volume/Å <sup>3</sup>                       | 4376.4(4)                                                        |
| Z                                           | 8                                                                |
| ρ <sub>calc</sub> /cm <sup>3</sup>          | 1.841                                                            |
| μ/mm <sup>-1</sup>                          | 11.789                                                           |
| F(000)                                      | 2320.0                                                           |
| Crystal size/mm <sup>3</sup>                | 0.2 × 0.1 × 0.1                                                  |
| Radiation                                   | CuKα (λ = 1.54184)                                               |
| 2θ range for data collection/°              | 9.61 to 143.752                                                  |
| Index ranges                                | -37 ≤ h ≤ 43, -21 ≤ k ≤ 22, -8 ≤ l ≤ 4                           |
| Reflections collected                       | 8374                                                             |
| Independent reflections                     | 2305 [R <sub>int</sub> = 0.0404, R <sub>sigma</sub> = 0.0381]    |
| Data/restraints/parameters                  | 2305/0/168                                                       |
| Goodness-of-fit on F <sup>2</sup>           | 1.066                                                            |
| Final R indexes [I ≥ 2σ (I)]                | R <sub>1</sub> = 0.0813, wR <sub>2</sub> = 0.2449                |
| Final R indexes [all data]                  | R <sub>1</sub> = 0.1065, wR <sub>2</sub> = 0.2750                |
| Largest diff. peak/hole / e Å <sup>-3</sup> | 2.53/-2.13                                                       |

**Table S2 Fractional Atomic Coordinates ( $\times 10^4$ ) and Equivalent Isotropic Displacement Parameters ( $\text{\AA}^2 \times 10^3$ ) for 2\_green.  $U_{\text{eq}}$  is defined as 1/3 of the trace of the orthogonalised  $U_{ij}$  tensor.**

| Atom | <i>x</i>   | <i>y</i>   | <i>z</i>  | $U(\text{eq})$ |
|------|------------|------------|-----------|----------------|
| C1   | 4735 (10)  | 2769 (11)  | 5000      | 96 (10)        |
| C2   | 4724 (8)   | 3581 (11)  | 5000      | 71 (7)         |
| C3   | 4325 (6)   | 3900 (10)  | 5000      | 60 (5)         |
| C4   | 4301 (6)   | 4651 (9)   | 5000      | 48 (4)         |
| C5   | 3957 (6)   | 5012 (10)  | 5000      | 48 (4)         |
| C6   | 3649 (7)   | 4561 (10)  | 5000      | 59 (5)         |
| C7   | 3648 (7)   | 3801 (9)   | 5000      | 55 (5)         |
| C8   | 3994 (6)   | 3495 (9)   | 5000      | 51 (5)         |
| N1   | 3485 (5)   | 5913 (7)   | 5000      | 44 (3)         |
| C9   | 3871 (5)   | 5771 (11)  | 5000      | 48 (4)         |
| C10  | 4104 (6)   | 6328 (9)   | 5000      | 53 (5)         |
| C11  | 3993 (5)   | 7047 (10)  | 5000      | 53 (5)         |
| C12  | 3627 (6)   | 7184 (9)   | 5000      | 55 (5)         |
| C13  | 3368 (7)   | 6587 (10)  | 5000      | 56 (5)         |
| N2   | 2996 (6)   | 3959 (9)   | 5000      | 61 (5)         |
| C14  | 3294 (7)   | 3485 (11)  | 5000      | 57 (5)         |
| C15  | 3216 (8)   | 2728 (12)  | 5000      | 72 (7)         |
| C16  | 2853 (9)   | 2485 (13)  | 5000      | 84 (8)         |
| C17  | 2589 (9)   | 2966 (16)  | 5000      | 94 (10)        |
| C18  | 2651 (7)   | 3747 (14)  | 5000      | 73 (6)         |
| C19  | 2634 (7)   | 5505 (12)  | 5000      | 64 (6)         |
| N3   | 2336 (7)   | 5733 (11)  | 5000      | 87 (6)         |
| O1   | 4987 (5)   | 3957 (11)  | 5000      | 110 (9)        |
| Pt01 | 3155.5 (2) | 5021.9 (4) | 5000      | 50.0 (5)       |
| O2   | 1717 (9)   | 5911 (17)  | 8030 (50) | 256 (17)       |
| O3   | 4376 (3)   | 941 (6)    | 2372 (15) | 58 (2)         |
| O4   | 4365 (3)   | 924 (5)    | 3885 (17) | 62 (2)         |
| O5   | 4462 (5)   | 925 (9)    | 1060 (30) | 51 (4)         |

**Table S3 Anisotropic Displacement Parameters ( $\text{\AA}^2 \times 10^3$ ) for 2\_green. The Anisotropic displacement factor exponent takes the form:  $-2\pi^2[h^2a^2U_{11}+2hka*b*U_{12}+\dots]$ .**

| Atom | $U_{11}$ | $U_{22}$ | $U_{33}$ | $U_{23}$ | $U_{13}$ | $U_{12}$ |
|------|----------|----------|----------|----------|----------|----------|
| C1   | 170 (30) | 34 (10)  | 82 (19)  | 0        | 0        | 24 (14)  |
| C2   | 107 (19) | 37 (10)  | 67 (15)  | 0        | 0        | 28 (11)  |
| C3   | 69 (13)  | 45 (10)  | 65 (13)  | 0        | 0        | 13 (9)   |
| C4   | 71 (12)  | 30 (8)   | 42 (10)  | 0        | 0        | 15 (8)   |
| C5   | 58 (10)  | 62 (12)  | 23 (9)   | 0        | 0        | 4 (9)    |
| C6   | 104 (17) | 38 (9)   | 35 (10)  | 0        | 0        | 3 (10)   |
| C7   | 88 (15)  | 39 (9)   | 38 (10)  | 0        | 0        | -5 (9)   |
| C8   | 81 (14)  | 25 (8)   | 46 (11)  | 0        | 0        | -3 (8)   |
| N1   | 67 (9)   | 32 (6)   | 33 (8)   | 0        | 0        | -1 (6)   |
| C9   | 56 (11)  | 59 (11)  | 30 (9)   | 0        | 0        | 8 (9)    |
| C10  | 78 (14)  | 37 (9)   | 44 (11)  | 0        | 0        | -10 (9)  |
| C11  | 53 (11)  | 50 (10)  | 55 (12)  | 0        | 0        | -6 (8)   |
| C12  | 81 (14)  | 29 (8)   | 55 (12)  | 0        | 0        | 8 (8)    |
| C13  | 73 (14)  | 48 (10)  | 46 (11)  | 0        | 0        | 2 (9)    |
| N2   | 88 (13)  | 53 (9)   | 42 (9)   | 0        | 0        | -30 (9)  |
| C14  | 79 (14)  | 58 (11)  | 32 (10)  | 0        | 0        | -3 (11)  |
| C15  | 100 (20) | 57 (12)  | 56 (14)  | 0        | 0        | -13 (12) |
| C16  | 110 (20) | 46 (12)  | 90 (20)  | 0        | 0        | -22 (13) |
| C17  | 110 (20) | 100 (20) | 75 (18)  | 0        | 0        | -68 (19) |
| C18  | 70 (15)  | 86 (16)  | 62 (15)  | 0        | 0        | -27 (13) |
| C19  | 79 (16)  | 52 (11)  | 61 (14)  | 0        | 0        | 2 (11)   |
| N3   | 88 (15)  | 55 (11)  | 117 (19) | 0        | 0        | -1 (11)  |
| O1   | 79 (12)  | 57 (10)  | 190 (30) | 0        | 0        | -1 (9)   |
| Pt01 | 65.1 (7) | 45.4 (6) | 39.6 (7) | 0        | 0        | -2.9 (4) |
| O2   | 164 (19) | 160 (20) | 450 (50) | 0 (20)   | 70 (20)  | 20 (20)  |

**Table S4 Bond Lengths for 2\_green.**

| Atom | Atom | Length/Å   | Atom | Atom            | Length/Å   |
|------|------|------------|------|-----------------|------------|
| C1   | C2   | 1.49 (3)   | C10  | C11             | 1.38 (2)   |
| C2   | C3   | 1.55 (3)   | C11  | C12             | 1.34 (3)   |
| C2   | O1   | 1.17 (3)   | C12  | C13             | 1.44 (3)   |
| C3   | C4   | 1.38 (2)   | N2   | C14             | 1.38 (3)   |
| C3   | C8   | 1.40 (3)   | N2   | C18             | 1.29 (3)   |
| C4   | C5   | 1.40 (3)   | N2   | Pt01            | 2.038 (16) |
| C5   | C6   | 1.38 (3)   | C14  | C15             | 1.42 (3)   |
| C5   | C9   | 1.43 (2)   | C15  | C16             | 1.38 (4)   |
| C6   | C7   | 1.40 (2)   | C16  | C17             | 1.30 (4)   |
| C6   | Pt01 | 1.96 (2)   | C17  | C18             | 1.46 (3)   |
| C7   | C8   | 1.36 (3)   | C19  | N3              | 1.15 (3)   |
| C7   | C14  | 1.40 (3)   | C19  | Pt01            | 2.07 (3)   |
| N1   | C9   | 1.41 (2)   | O3   | O4              | 1.005 (12) |
| N1   | C13  | 1.31 (2)   | O3   | O5              | 0.927 (19) |
| N1   | Pt01 | 2.022 (14) | O4   | O4 <sup>1</sup> | 1.48 (2)   |
| C9   | C10  | 1.32 (3)   | O5   | O5 <sup>2</sup> | 1.40 (4)   |

<sup>1</sup>+x,+y,1-z; <sup>2</sup>+x,+y,-z

Table S5 Bond Angles for 2\_green.

| Atom | Atom | Atom | Angle/°    | Atom | Atom | Atom            | Angle/°    |
|------|------|------|------------|------|------|-----------------|------------|
| C1   | C2   | C3   | 114 (2)    | C12  | C11  | C10             | 117.6 (19) |
| O1   | C2   | C1   | 125 (3)    | C11  | C12  | C13             | 119.4 (18) |
| O1   | C2   | C3   | 121.4 (19) | N1   | C13  | C12             | 121 (2)    |
| C4   | C3   | C2   | 116 (2)    | C14  | N2   | Pt01            | 113.0 (14) |
| C4   | C3   | C8   | 118.6 (19) | C18  | N2   | C14             | 123 (2)    |
| C8   | C3   | C2   | 125.5 (18) | C18  | N2   | Pt01            | 123.8 (18) |
| C3   | C4   | C5   | 122 (2)    | C7   | C14  | C15             | 126 (2)    |
| C4   | C5   | C9   | 130.9 (18) | N2   | C14  | C7              | 116.0 (18) |
| C6   | C5   | C4   | 114.6 (17) | N2   | C14  | C15             | 118 (2)    |
| C6   | C5   | C9   | 114.5 (18) | C16  | C15  | C14             | 120 (2)    |
| C5   | C6   | C7   | 127 (2)    | C17  | C16  | C15             | 118 (2)    |
| C5   | C6   | Pt01 | 117.4 (13) | C16  | C17  | C18             | 124 (3)    |
| C7   | C6   | Pt01 | 115.4 (19) | N2   | C18  | C17             | 116 (3)    |
| C8   | C7   | C6   | 114 (2)    | N3   | C19  | Pt01            | 176 (2)    |
| C8   | C7   | C14  | 130.9 (17) | C6   | Pt01 | N1              | 79.9 (7)   |
| C14  | C7   | C6   | 115 (2)    | C6   | Pt01 | N2              | 80.6 (8)   |
| C7   | C8   | C3   | 123.4 (16) | C6   | Pt01 | C19             | 179.8 (8)  |
| C9   | N1   | Pt01 | 115.0 (12) | N1   | Pt01 | N2              | 160.5 (7)  |
| C13  | N1   | C9   | 119.6 (17) | N1   | Pt01 | C19             | 100.3 (7)  |
| C13  | N1   | Pt01 | 125.5 (15) | N2   | Pt01 | C19             | 99.1 (8)   |
| N1   | C9   | C5   | 113.3 (17) | O5   | O3   | O4              | 162.2 (19) |
| C10  | C9   | C5   | 128.3 (19) | O3   | O4   | O4 <sup>1</sup> | 177.2 (9)  |
| C10  | C9   | N1   | 118.4 (18) | O3   | O5   | O5 <sup>2</sup> | 160.4 (13) |
| C9   | C10  | C11  | 124 (2)    |      |      |                 |            |

<sup>1</sup>+x,+y,1-z; <sup>2</sup>+x,+y,-z

**Table S6 Torsion Angles for 2\_green.**

| <b>A</b> | <b>B</b> | <b>C</b> | <b>D</b> | <b>Angle/°</b> | <b>A</b> | <b>B</b> | <b>C</b> | <b>D</b>        | <b>Angle/°</b> |
|----------|----------|----------|----------|----------------|----------|----------|----------|-----------------|----------------|
| C1       | C2       | C3       | C4       | 180.0          | C9       | N1       | C13      | C12             | 0.0            |
| C1       | C2       | C3       | C8       | 0.0            | C9       | C10      | C11      | C12             | 0.0            |
| C2       | C3       | C4       | C5       | 180.0          | C10      | C11      | C12      | C13             | 0.0            |
| C2       | C3       | C8       | C7       | 180.0          | C11      | C12      | C13      | N1              | 0.0            |
| C3       | C4       | C5       | C6       | 0.0            | C13      | N1       | C9       | C5              | 180.0          |
| C3       | C4       | C5       | C9       | 180.0          | C13      | N1       | C9       | C10             | 0.0            |
| C4       | C3       | C8       | C7       | 0.0            | N2       | C14      | C15      | C16             | 0.0            |
| C4       | C5       | C6       | C7       | 0.0            | C14      | C7       | C8       | C3              | 180.0          |
| C4       | C5       | C6       | Pt01     | 180.0          | C14      | N2       | C18      | C17             | 0.0            |
| C4       | C5       | C9       | N1       | 180.0          | C14      | C15      | C16      | C17             | 0.0            |
| C4       | C5       | C9       | C10      | 0.0            | C15      | C16      | C17      | C18             | 0.0            |
| C5       | C6       | C7       | C8       | 0.0            | C16      | C17      | C18      | N2              | 0.0            |
| C5       | C6       | C7       | C14      | 180.0          | C18      | N2       | C14      | C7              | 180.0          |
| C5       | C9       | C10      | C11      | 180.0          | C18      | N2       | C14      | C15             | 0.0            |
| C6       | C5       | C9       | N1       | 0.0            | O1       | C2       | C3       | C4              | 0.0            |
| C6       | C5       | C9       | C10      | 180.0          | O1       | C2       | C3       | C8              | 180.0          |
| C6       | C7       | C8       | C3       | 0.0            | Pt01     | C6       | C7       | C8              | 180.0          |
| C6       | C7       | C14      | N2       | 0.0            | Pt01     | C6       | C7       | C14             | 0.0            |
| C6       | C7       | C14      | C15      | 180.0          | Pt01     | N1       | C9       | C5              | 0.0            |
| C7       | C14      | C15      | C16      | 180.0          | Pt01     | N1       | C9       | C10             | 180.0          |
| C8       | C3       | C4       | C5       | 0.0            | Pt01     | N1       | C13      | C12             | 180.0          |
| C8       | C7       | C14      | N2       | 180.0          | Pt01     | N2       | C14      | C7              | 0.0            |
| C8       | C7       | C14      | C15      | 0.0            | Pt01     | N2       | C14      | C15             | 180.0          |
| N1       | C9       | C10      | C11      | 0.0            | Pt01     | N2       | C18      | C17             | 180.0          |
| C9       | C5       | C6       | C7       | 180.0          | O4       | O3       | O5       | O5 <sup>1</sup> | 174 (3)        |
| C9       | C5       | C6       | Pt01     | 0.0            |          |          |          |                 |                |

<sup>1</sup>+X,+Y,-Z



**Table S7 Hydrogen Atom Coordinates ( $\text{\AA}\times 10^4$ ) and Isotropic Displacement Parameters ( $\text{\AA}^2\times 10^3$ ) for 2\_green.**

| Atom | <i>x</i> | <i>y</i> | <i>z</i> | U(eq) |
|------|----------|----------|----------|-------|
| H1A  | 4499     | 2580     | 4465     | 145   |
| H1B  | 4771     | 2594     | 6381     | 145   |
| H1C  | 4942     | 2603     | 4154     | 145   |
| H4   | 4524     | 4929     | 5000     | 57    |
| H8   | 4012     | 2980     | 5000     | 61    |
| H10  | 4364     | 6228     | 5000     | 64    |
| H11  | 4170     | 7431     | 5000     | 63    |
| H12  | 3538     | 7670     | 5000     | 66    |
| H13  | 3107     | 6683     | 5000     | 67    |
| H15  | 3415     | 2388     | 5000     | 86    |
| H16  | 2797     | 1980     | 5000     | 100   |
| H17  | 2338     | 2798     | 5000     | 113   |
| H18  | 2450     | 4084     | 5000     | 87    |

**Data for 2(yellow)****Table S8 Crystal data and structure refinement for 2\_yellow.**

|                                             |                                                               |
|---------------------------------------------|---------------------------------------------------------------|
| Identification code                         | 2_yellow                                                      |
| Empirical formula                           | C <sub>19</sub> H <sub>13</sub> N <sub>3</sub> OPt            |
| Formula weight                              | 494.41                                                        |
| Temperature/K                               | 150.0(2)                                                      |
| Crystal system                              | monoclinic                                                    |
| Space group                                 | P2 <sub>1</sub> /c                                            |
| a/Å                                         | 6.8945(2)                                                     |
| b/Å                                         | 15.5988(4)                                                    |
| c/Å                                         | 14.7127(5)                                                    |
| α/°                                         | 90                                                            |
| β/°                                         | 102.975(3)                                                    |
| γ/°                                         | 90                                                            |
| Volume/Å <sup>3</sup>                       | 1541.90(8)                                                    |
| Z                                           | 4                                                             |
| ρ <sub>calc</sub> /cm <sup>3</sup>          | 2.130                                                         |
| μ/mm <sup>-1</sup>                          | 9.110                                                         |
| F(000)                                      | 936.0                                                         |
| Crystal size/mm <sup>3</sup>                | 0.25 × 0.2 × 0.18                                             |
| Radiation                                   | MoKα (λ = 0.71073)                                            |
| 2θ range for data collection/°              | 5.682 to 59.348                                               |
| Index ranges                                | -9 ≤ h ≤ 9, -21 ≤ k ≤ 21, -20 ≤ l ≤ 19                        |
| Reflections collected                       | 33906                                                         |
| Independent reflections                     | 4100 [R <sub>int</sub> = 0.0652, R <sub>sigma</sub> = 0.0456] |
| Data/restraints/parameters                  | 4100/0/218                                                    |
| Goodness-of-fit on F <sup>2</sup>           | 1.037                                                         |
| Final R indexes [I ≥ 2σ (I)]                | R <sub>1</sub> = 0.0290, wR <sub>2</sub> = 0.0402             |
| Final R indexes [all data]                  | R <sub>1</sub> = 0.0501, wR <sub>2</sub> = 0.0448             |
| Largest diff. peak/hole / e Å <sup>-3</sup> | 0.99/-0.71                                                    |

**Table S9 Fractional Atomic Coordinates ( $\times 10^4$ ) and Equivalent Isotropic Displacement Parameters ( $\text{\AA}^2 \times 10^3$ ) for 2\_yellow.  $U_{\text{eq}}$  is defined as 1/3 of the trace of the orthogonalised  $U_{ij}$  tensor.**

| Atom | <i>x</i>   | <i>y</i>     | <i>z</i>   | $U(\text{eq})$ |
|------|------------|--------------|------------|----------------|
| Pt1  | 3138.7 (2) | 975.1 (2)    | 5744.5 (2) | 19.09 (5)      |
| N3   | 4449 (6)   | 2950 (2)     | 5861 (2)   | 38.0 (9)       |
| C3   | 1714 (5)   | -1962 (2)    | 5814 (3)   | 23.8 (8)       |
| C2   | 1232 (6)   | -2889 (2)    | 5870 (3)   | 28.3 (9)       |
| C9   | 2970 (5)   | 0 (2)        | 7402 (3)   | 22.2 (8)       |
| C18  | 2818 (5)   | 1241 (2)     | 3667 (3)   | 24.0 (8)       |
| C1   | 960 (7)    | -3429 (3)    | 5003 (3)   | 39.1 (11)      |
| C10  | 3045 (6)   | -182 (3)     | 8327 (3)   | 27.0 (9)       |
| N1   | 3333 (4)   | 816.2 (18)   | 7134 (2)   | 20.8 (7)       |
| O1   | 1082 (5)   | -3207.5 (18) | 6605 (2)   | 43.4 (8)       |
| C6   | 2516 (5)   | -232 (2)     | 5774 (2)   | 19.2 (8)       |
| C19  | 3938 (6)   | 2248 (2)     | 5781 (3)   | 24.3 (8)       |
| C8   | 1740 (5)   | -1570 (2)    | 4965 (3)   | 23.6 (8)       |
| N2   | 2699 (4)   | 691.0 (18)   | 4359 (2)   | 21.1 (7)       |
| C12  | 3819 (6)   | 1276 (3)     | 8716 (3)   | 32.8 (10)      |
| C15  | 1918 (5)   | -425 (2)     | 3219 (3)   | 24.0 (8)       |
| C4   | 2109 (5)   | -1489 (2)    | 6650 (3)   | 24.4 (9)       |
| C17  | 2533 (6)   | 991 (3)      | 2750 (3)   | 27.6 (9)       |
| C13  | 3767 (6)   | 1433 (2)     | 7783 (3)   | 28.6 (9)       |
| C7   | 2134 (5)   | -692 (2)     | 4941 (3)   | 20.9 (8)       |
| C14  | 2238 (5)   | -154 (2)     | 4134 (2)   | 19.9 (8)       |
| C11  | 3435 (6)   | 463 (3)      | 8987 (3)   | 31.9 (10)      |
| C5   | 2506 (5)   | -616 (2)     | 6625 (3)   | 22.4 (8)       |
| C16  | 2073 (5)   | 148 (2)      | 2518 (3)   | 26.7 (9)       |

**Table S10 Anisotropic Displacement Parameters ( $\text{\AA}^2 \times 10^3$ ) for 2\_yellow. The Anisotropic displacement factor exponent takes the form:**

$$-2\pi^2[h^2a^2U_{11}+2hka*b*U_{12}+...].$$

| Atom | $U_{11}$  | $U_{22}$  | $U_{33}$  | $U_{23}$  | $U_{13}$  | $U_{12}$  |
|------|-----------|-----------|-----------|-----------|-----------|-----------|
| Pt1  | 20.09 (8) | 19.53 (7) | 17.63 (8) | -0.36 (7) | 4.18 (5)  | 0.70 (7)  |
| N3   | 56 (2)    | 33 (2)    | 26 (2)    | -0.4 (17) | 10.9 (17) | -5.5 (19) |
| C3   | 21 (2)    | 24.1 (19) | 27 (2)    | 2.6 (17)  | 6.6 (16)  | 5.1 (16)  |
| C2   | 20 (2)    | 25.3 (19) | 39 (3)    | 2 (2)     | 5.4 (18)  | 1.0 (17)  |
| C9   | 17.6 (19) | 27 (2)    | 20 (2)    | -1.0 (17) | 2.1 (15)  | 3.7 (16)  |
| C18  | 24 (2)    | 25.0 (19) | 23 (2)    | 2.7 (16)  | 4.1 (16)  | -0.5 (16) |
| C1   | 47 (3)    | 23 (2)    | 47 (3)    | -2 (2)    | 12 (2)    | -1.8 (19) |
| C10  | 24 (2)    | 31 (2)    | 25 (2)    | 5.2 (18)  | 4.6 (17)  | 6.1 (17)  |
| N1   | 20.1 (16) | 26.2 (17) | 15.5 (16) | 0.0 (13)  | 3.1 (13)  | 4.1 (13)  |
| O1   | 60 (2)    | 30.5 (16) | 38.0 (19) | 8.3 (14)  | 8.3 (16)  | -5.9 (15) |
| C6   | 15.3 (18) | 18.8 (17) | 22 (2)    | 1.4 (15)  | 2.1 (15)  | 1.8 (14)  |
| C19  | 33 (2)    | 22 (2)    | 18 (2)    | 1.7 (16)  | 6.2 (17)  | 2.0 (17)  |
| C8   | 23 (2)    | 22.1 (19) | 26 (2)    | -2.9 (16) | 5.2 (17)  | 3.5 (16)  |
| N2   | 19.7 (16) | 22.2 (15) | 20.8 (17) | 0.1 (13)  | 3.5 (13)  | 2.4 (13)  |
| C12  | 40 (3)    | 36 (2)    | 20 (2)    | -5.8 (18) | 1.9 (19)  | 10.2 (19) |
| C15  | 19 (2)    | 29 (2)    | 24 (2)    | -0.5 (17) | 3.3 (16)  | 2.2 (16)  |
| C4   | 20 (2)    | 28 (2)    | 26 (2)    | 8.0 (17)  | 6.6 (16)  | 4.5 (16)  |
| C17  | 26 (2)    | 37 (2)    | 22 (2)    | 6.8 (19)  | 7.4 (16)  | -2.0 (19) |
| C13  | 30 (2)    | 28 (2)    | 27 (2)    | -3.3 (18) | 3.6 (18)  | 4.9 (17)  |
| C7   | 14.4 (18) | 27.0 (19) | 21 (2)    | -2.4 (16) | 3.6 (15)  | 3.2 (15)  |
| C14  | 14.5 (19) | 24.8 (18) | 21 (2)    | 0.1 (16)  | 4.1 (15)  | 0.6 (15)  |
| C11  | 35 (2)    | 40 (2)    | 21 (2)    | 4.6 (19)  | 4.3 (18)  | 9.9 (19)  |
| C5   | 18 (2)    | 26.9 (19) | 23 (2)    | 2.7 (17)  | 5.9 (16)  | 7.2 (16)  |
| C16  | 21 (2)    | 38 (2)    | 21 (2)    | -2.5 (18) | 5.9 (16)  | 2.3 (18)  |

**Table S11 Bond Lengths for 2\_yellow.**

| Atom | Atom | Length/Å  | Atom | Atom | Length/Å  |
|------|------|-----------|------|------|-----------|
| Pt1  | N1   | 2.033 (3) | C18  | C17  | 1.376 (5) |
| Pt1  | C6   | 1.934 (3) | C10  | C11  | 1.383 (5) |
| Pt1  | C19  | 2.058 (4) | N1   | C13  | 1.342 (5) |
| Pt1  | N2   | 2.042 (3) | C6   | C7   | 1.393 (5) |
| N3   | C19  | 1.148 (5) | C6   | C5   | 1.390 (5) |
| C3   | C2   | 1.489 (5) | C8   | C7   | 1.398 (5) |
| C3   | C8   | 1.395 (5) | N2   | C14  | 1.379 (4) |
| C3   | C4   | 1.408 (5) | C12  | C13  | 1.387 (5) |
| C2   | C1   | 1.505 (6) | C12  | C11  | 1.373 (6) |
| C2   | O1   | 1.216 (5) | C15  | C14  | 1.381 (5) |
| C9   | C10  | 1.381 (5) | C15  | C16  | 1.387 (5) |
| C9   | N1   | 1.372 (4) | C4   | C5   | 1.391 (5) |
| C9   | C5   | 1.472 (5) | C17  | C16  | 1.378 (5) |
| C18  | N2   | 1.347 (5) | C7   | C14  | 1.468 (5) |

**Table S12 Bond Angles for 2\_yellow.**

| Atom | Atom | Atom | Angle/°     | Atom | Atom | Atom | Angle/°   |
|------|------|------|-------------|------|------|------|-----------|
| N1   | Pt1  | C19  | 97.74 (13)  | C5   | C6   | C7   | 122.2 (3) |
| N1   | Pt1  | N2   | 159.89 (12) | N3   | C19  | Pt1  | 175.5 (3) |
| C6   | Pt1  | N1   | 79.84 (13)  | C3   | C8   | C7   | 119.6 (3) |
| C6   | Pt1  | C19  | 176.61 (15) | C18  | N2   | Pt1  | 126.5 (3) |
| C6   | Pt1  | N2   | 80.04 (13)  | C18  | N2   | C14  | 118.6 (3) |
| N2   | Pt1  | C19  | 102.37 (13) | C14  | N2   | Pt1  | 114.9 (2) |
| C8   | C3   | C2   | 121.6 (3)   | C11  | C12  | C13  | 119.1 (4) |
| C8   | C3   | C4   | 120.9 (3)   | C14  | C15  | C16  | 120.4 (4) |
| C4   | C3   | C2   | 117.5 (3)   | C5   | C4   | C3   | 119.4 (4) |
| C3   | C2   | C1   | 118.9 (4)   | C18  | C17  | C16  | 119.2 (4) |
| O1   | C2   | C3   | 120.7 (4)   | N1   | C13  | C12  | 122.0 (4) |
| O1   | C2   | C1   | 120.4 (4)   | C6   | C7   | C8   | 118.8 (3) |
| C10  | C9   | C5   | 125.7 (3)   | C6   | C7   | C14  | 112.6 (3) |
| N1   | C9   | C10  | 120.4 (3)   | C8   | C7   | C14  | 128.7 (3) |
| N1   | C9   | C5   | 113.9 (3)   | N2   | C14  | C15  | 120.2 (3) |
| N2   | C18  | C17  | 122.7 (4)   | N2   | C14  | C7   | 113.8 (3) |
| C9   | C10  | C11  | 120.1 (4)   | C15  | C14  | C7   | 126.0 (3) |
| C9   | N1   | Pt1  | 115.3 (2)   | C12  | C11  | C10  | 119.2 (4) |
| C13  | N1   | Pt1  | 125.6 (3)   | C6   | C5   | C9   | 111.9 (3) |
| C13  | N1   | C9   | 119.1 (3)   | C6   | C5   | C4   | 119.1 (4) |
| C7   | C6   | Pt1  | 118.7 (3)   | C4   | C5   | C9   | 129.0 (4) |
| C5   | C6   | Pt1  | 119.1 (3)   | C17  | C16  | C15  | 118.8 (4) |

**Table S13 Torsion Angles for 2\_yellow.**

| A   | B   | C   | D   | Angle/°   | A   | B   | C   | D   | Angle/°   |
|-----|-----|-----|-----|-----------|-----|-----|-----|-----|-----------|
| Pt1 | N1  | C13 | C12 | 178.3(3)  | C6  | C7  | C14 | N2  | 0.3(4)    |
| Pt1 | C6  | C7  | C8  | 178.2(3)  | C6  | C7  | C14 | C15 | -179.6(3) |
| Pt1 | C6  | C7  | C14 | -1.0(4)   | C8  | C3  | C2  | C1  | 5.9(5)    |
| Pt1 | C6  | C5  | C9  | 0.9(4)    | C8  | C3  | C2  | O1  | -174.9(4) |
| Pt1 | C6  | C5  | C4  | -178.3(3) | C8  | C3  | C4  | C5  | 0.8(5)    |
| Pt1 | N2  | C14 | C15 | -179.7(3) | C8  | C7  | C14 | N2  | -178.8(3) |
| Pt1 | N2  | C14 | C7  | 0.5(4)    | C8  | C7  | C14 | C15 | 1.3(6)    |
| C3  | C8  | C7  | C6  | 0.8(5)    | N2  | C18 | C17 | C16 | 1.1(6)    |
| C3  | C8  | C7  | C14 | 179.8(3)  | C4  | C3  | C2  | C1  | -175.3(3) |
| C3  | C4  | C5  | C9  | -179.5(3) | C4  | C3  | C2  | O1  | 3.9(5)    |
| C3  | C4  | C5  | C6  | -0.4(5)   | C4  | C3  | C8  | C7  | -1.0(5)   |
| C2  | C3  | C8  | C7  | 177.8(3)  | C17 | C18 | N2  | Pt1 | 178.8(3)  |
| C2  | C3  | C4  | C5  | -178.0(3) | C17 | C18 | N2  | C14 | -1.2(5)   |
| C9  | C10 | C11 | C12 | -2.5(6)   | C13 | C12 | C11 | C10 | 1.3(6)    |
| C9  | N1  | C13 | C12 | -1.4(6)   | C7  | C6  | C5  | C9  | 179.4(3)  |
| C18 | N2  | C14 | C15 | 0.4(5)    | C7  | C6  | C5  | C4  | 0.3(5)    |
| C18 | N2  | C14 | C7  | -179.5(3) | C14 | C15 | C16 | C17 | -0.6(5)   |
| C18 | C17 | C16 | C15 | -0.2(5)   | C11 | C12 | C13 | N1  | 0.7(6)    |
| C10 | C9  | N1  | Pt1 | -179.5(3) | C5  | C9  | C10 | C11 | -177.8(4) |
| C10 | C9  | N1  | C13 | 0.2(5)    | C5  | C9  | N1  | Pt1 | 0.1(4)    |
| C10 | C9  | C5  | C6  | 179.0(3)  | C5  | C9  | N1  | C13 | 179.8(3)  |
| C10 | C9  | C5  | C4  | -1.9(6)   | C5  | C6  | C7  | C8  | -0.4(5)   |
| N1  | C9  | C10 | C11 | 1.7(5)    | C5  | C6  | C7  | C14 | -179.6(3) |
| N1  | C9  | C5  | C6  | -0.6(4)   | C16 | C15 | C14 | N2  | 0.5(5)    |
| N1  | C9  | C5  | C4  | 178.5(3)  | C16 | C15 | C14 | C7  | -179.6(3) |

**Table S14 Hydrogen Atom Coordinates ( $\text{\AA}\times 10^4$ ) and  
Isotropic Displacement Parameters ( $\text{\AA}^2\times 10^3$ ) for 2\_yellow.**

| Atom | <i>x</i> | <i>y</i> | <i>z</i> | U(eq) |
|------|----------|----------|----------|-------|
| H18  | 3112     | 1826     | 3819     | 29    |
| H1A  | 797      | -4031    | 5162     | 59    |
| H1B  | 2131     | -3371    | 4734     | 59    |
| H1C  | -226     | -3237    | 4549     | 59    |
| H10  | 2828     | -752     | 8510     | 32    |
| H8   | 1492     | -1897    | 4406     | 28    |
| H12  | 4117     | 1725     | 9162     | 39    |
| H15  | 1590     | -1007    | 3069     | 29    |
| H4   | 2105     | -1763    | 7226     | 29    |
| H17  | 2652     | 1395     | 2282     | 33    |
| H13  | 4048     | 1995     | 7598     | 34    |
| H11  | 3436     | 345      | 9621     | 38    |
| H16  | 1865     | -38      | 1888     | 32    |



**Data for 3(yellow)****Table S15 Crystal data and structure refinement for 3\_yellow.**

|                                             |                                                                                               |
|---------------------------------------------|-----------------------------------------------------------------------------------------------|
| Identification code                         | 3_yellow                                                                                      |
| Empirical formula                           | C <sub>41</sub> H <sub>32</sub> Cl <sub>2</sub> N <sub>6</sub> O <sub>4</sub> Pt <sub>2</sub> |
| Formula weight                              | 1133.80                                                                                       |
| Temperature/K                               | 150.00(10)                                                                                    |
| Crystal system                              | triclinic                                                                                     |
| Space group                                 | P-1                                                                                           |
| a/Å                                         | 7.2730(2)                                                                                     |
| b/Å                                         | 11.5993(2)                                                                                    |
| c/Å                                         | 21.8397(4)                                                                                    |
| α/°                                         | 87.882(2)                                                                                     |
| β/°                                         | 85.973(2)                                                                                     |
| γ/°                                         | 83.861(2)                                                                                     |
| Volume/Å <sup>3</sup>                       | 1826.54(7)                                                                                    |
| Z                                           | 2                                                                                             |
| ρ <sub>calc</sub> /cm <sup>3</sup>          | 2.062                                                                                         |
| μ/mm <sup>-1</sup>                          | 15.147                                                                                        |
| F(000)                                      | 1084.0                                                                                        |
| Crystal size/mm <sup>3</sup>                | 0.18 × 0.12 × 0.1                                                                             |
| Radiation                                   | CuKα (λ = 1.54184)                                                                            |
| 2θ range for data collection/°              | 8.786 to 143.84                                                                               |
| Index ranges                                | -7 ≤ h ≤ 7, -14 ≤ k ≤ 14, -26 ≤ l ≤ 24                                                        |
| Reflections collected                       | 21583                                                                                         |
| Independent reflections                     | 5670 [R <sub>int</sub> = 0.0594, R <sub>sigma</sub> = 0.0444]                                 |
| Data/restraints/parameters                  | 5670/0/498                                                                                    |
| Goodness-of-fit on F <sup>2</sup>           | 1.036                                                                                         |
| Final R indexes [I ≥ 2σ (I)]                | R <sub>1</sub> = 0.0479, wR <sub>2</sub> = 0.1283                                             |
| Final R indexes [all data]                  | R <sub>1</sub> = 0.0507, wR <sub>2</sub> = 0.1325                                             |
| Largest diff. peak/hole / e Å <sup>-3</sup> | 2.18/-1.73                                                                                    |

**Table S16 Fractional Atomic Coordinates ( $\times 10^4$ ) and Equivalent Isotropic Displacement Parameters ( $\text{\AA}^2 \times 10^3$ ) for 3\_yellow.  $U_{eq}$  is defined as 1/3 of the trace of the orthogonalised  $U_{IJ}$  tensor.**

| Atom | x          | y           | z           | U(eq)     |
|------|------------|-------------|-------------|-----------|
| C1   | -1229 (16) | 3825 (8)    | 4801 (4)    | 46 (3)    |
| C2   | -1211 (13) | 3772 (6)    | 4113 (4)    | 26 (2)    |
| C3   | -546 (11)  | 4960 (6)    | 3237 (3)    | 21.9 (19) |
| C4   | 14 (11)    | 6102 (6)    | 3015 (3)    | 20.9 (19) |
| C5   | 247 (11)   | 6314 (6)    | 2377 (3)    | 20.1 (19) |
| C6   | 719 (11)   | 7371 (6)    | 2150 (3)    | 19.7 (19) |
| C7   | 994 (10)   | 8210 (5)    | 2569 (3)    | 17.4 (18) |
| C8   | 799 (11)   | 8026 (6)    | 3195 (3)    | 20.2 (18) |
| C9   | 303 (11)   | 6957 (5)    | 3427 (3)    | 20.8 (19) |
| C10  | 1104 (11)  | 7771 (6)    | 1509 (3)    | 20.9 (19) |
| C11  | 1048 (12)  | 7109 (6)    | 996 (3)     | 26 (2)    |
| C12  | 1458 (13)  | 7578 (6)    | 423 (4)     | 34 (2)    |
| C13  | 1886 (14)  | 8702 (7)    | 352 (4)     | 33 (2)    |
| C14  | 1982 (12)  | 9335 (6)    | 880 (4)     | 26 (2)    |
| C15  | 1217 (11)  | 9028 (6)    | 3543 (3)    | 19.8 (19) |
| C16  | 1214 (13)  | 9072 (7)    | 4169 (4)    | 29 (2)    |
| C17  | 1701 (12)  | 10049 (6)   | 4429 (3)    | 26 (2)    |
| C18  | 2178 (11)  | 10989 (6)   | 4060 (3)    | 25.2 (19) |
| C19  | 2143 (12)  | 10902 (6)   | 3438 (3)    | 25 (2)    |
| C20  | 2700 (13)  | 11254 (6)   | 1937 (3)    | 29 (2)    |
| C21  | 6510 (16)  | 6169 (8)    | -464 (4)    | 51 (3)    |
| C22  | 6668 (14)  | 7359 (7)    | -229 (3)    | 35 (2)    |
| C23  | 6558 (12)  | 8226 (6)    | 737 (3)     | 24 (2)    |
| C24  | 6253 (11)  | 8065 (6)    | 1421 (3)    | 16.8 (18) |
| C25  | 6548 (11)  | 8974 (6)    | 1782 (3)    | 21.3 (19) |
| C26  | 6355 (11)  | 8855 (6)    | 2424 (3)    | 20.4 (18) |
| C27  | 5818 (11)  | 7811 (6)    | 2675 (3)    | 20.2 (18) |
| C28  | 5503 (11)  | 6889 (6)    | 2313 (3)    | 15.8 (18) |
| C29  | 5699 (12)  | 7013 (6)    | 1686 (3)    | 21.1 (19) |
| C30  | 6606 (11)  | 9683 (6)    | 2882 (3)    | 21.2 (19) |
| C31  | 7064 (12)  | 10795 (6)   | 2775 (4)    | 27 (2)    |
| C32  | 7280 (11)  | 11498 (6)   | 3248 (4)    | 26 (2)    |
| C33  | 6962 (11)  | 11082 (6)   | 3846 (3)    | 25.4 (19) |
| C34  | 6532 (12)  | 9968 (6)    | 3944 (3)    | 26 (2)    |
| C35  | 4979 (11)  | 5875 (5)    | 2691 (3)    | 15.6 (18) |
| C36  | 4531 (11)  | 4843 (5)    | 2473 (3)    | 19.8 (18) |
| C37  | 4039 (12)  | 3964 (6)    | 2875 (3)    | 27 (2)    |
| C38  | 4030 (11)  | 4125 (6)    | 3502 (3)    | 24 (2)    |
| C39  | 4502 (11)  | 5145 (6)    | 3701 (3)    | 24 (2)    |
| C40  | 5702 (13)  | 7345 (6)    | 4507 (3)    | 29 (2)    |
| C41  | 8630 (20)  | 3134 (8)    | 1569 (5)    | 72 (4)    |
| Cl1  | 8326 (4)   | 4399.7 (19) | 1099.5 (12) | 54.7 (7)  |
| Cl2  | 8403 (4)   | 1888.1 (19) | 1181.5 (10) | 52.5 (7)  |
| N1   | 1594 (9)   | 8875 (4)    | 1455 (2)    | 20.0 (15) |
| N2   | 1727 (9)   | 9955 (5)    | 3174 (3)    | 22.8 (16) |
| N3   | 3223 (13)  | 12107 (6)   | 1803 (3)    | 45 (2)    |
| N4   | 6347 (9)   | 9268 (5)    | 3480 (3)    | 18.6 (15) |

| <b>Atom</b> | <b>x</b>   | <b>y</b>   | <b>z</b>   | <b>U(eq)</b> |
|-------------|------------|------------|------------|--------------|
| N5          | 4983 (9)   | 6013 (5)   | 3312 (3)   | 20.6 (16)    |
| N6          | 5751 (13)  | 7240 (6)   | 5022 (3)   | 45 (2)       |
| O1          | -892 (8)   | 4207 (4)   | 2913 (2)   | 29.9 (14)    |
| O2          | -613 (8)   | 4865 (4)   | 3856 (2)   | 23.5 (13)    |
| O3          | 6897 (9)   | 9130 (4)   | 487 (3)    | 39.5 (17)    |
| O4          | 6392 (8)   | 7247 (4)   | 431 (2)    | 30.5 (14)    |
| Pt1         | 1759.2 (5) | 9684.2 (2) | 2251.0 (2) | 19.36 (15)   |
| Pt2         | 5667.0 (4) | 7595.3 (2) | 3560.8 (2) | 17.12 (15)   |

**Table S17 Anisotropic Displacement Parameters ( $\text{\AA}^2 \times 10^3$ ) for 3\_yellow. The Anisotropic displacement factor exponent takes the form:**

$$-2\pi^2 [h^2 a^2 U_{11} + 2hka^*b^*U_{12} + \dots]$$

| Atom | U <sub>11</sub> | U <sub>22</sub> | U <sub>33</sub> | U <sub>23</sub> | U <sub>13</sub> | U <sub>12</sub> |
|------|-----------------|-----------------|-----------------|-----------------|-----------------|-----------------|
| C1   | 65 (8)          | 40 (5)          | 40 (5)          | 20 (4)          | -17 (5)         | -37 (5)         |
| C2   | 35 (6)          | 14 (3)          | 33 (4)          | 7 (3)           | -13 (4)         | -15 (3)         |
| C3   | 19 (5)          | 20 (3)          | 27 (4)          | 1 (3)           | -3 (3)          | -2 (3)          |
| C4   | 14 (5)          | 21 (3)          | 30 (4)          | 6 (3)           | -6 (4)          | -10 (3)         |
| C5   | 19 (5)          | 15 (3)          | 27 (4)          | 0 (3)           | -6 (3)          | -1 (3)          |
| C6   | 15 (5)          | 25 (3)          | 17 (3)          | 5 (3)           | 2 (3)           | 2 (3)           |
| C7   | 10 (4)          | 20 (3)          | 21 (3)          | 3 (2)           | 0 (3)           | 1 (3)           |
| C8   | 17 (5)          | 19 (3)          | 25 (4)          | -1 (3)          | -4 (3)          | 0 (3)           |
| C9   | 26 (5)          | 21 (3)          | 13 (3)          | 6 (2)           | 1 (3)           | 0 (3)           |
| C10  | 16 (5)          | 26 (3)          | 20 (4)          | 9 (3)           | -2 (3)          | -3 (3)          |
| C11  | 23 (5)          | 27 (4)          | 28 (4)          | -1 (3)          | -2 (4)          | -10 (3)         |
| C12  | 43 (6)          | 29 (4)          | 31 (4)          | -2 (3)          | -5 (4)          | -9 (4)          |
| C13  | 47 (7)          | 33 (4)          | 22 (4)          | 6 (3)           | -6 (4)          | -17 (4)         |
| C14  | 20 (5)          | 25 (4)          | 33 (4)          | 6 (3)           | -5 (4)          | -7 (3)          |
| C15  | 15 (5)          | 19 (3)          | 25 (4)          | 2 (3)           | -8 (3)          | 1 (3)           |
| C16  | 33 (6)          | 26 (4)          | 27 (4)          | 4 (3)           | -3 (4)          | 0 (4)           |
| C17  | 30 (6)          | 27 (4)          | 22 (4)          | 0 (3)           | -12 (4)         | -9 (4)          |
| C18  | 23 (5)          | 29 (4)          | 26 (4)          | -5 (3)          | -9 (4)          | -9 (3)          |
| C19  | 32 (6)          | 16 (3)          | 30 (4)          | 0 (3)           | -5 (4)          | -13 (3)         |
| C20  | 38 (6)          | 26 (4)          | 24 (4)          | 2 (3)           | -4 (4)          | -8 (4)          |
| C21  | 76 (9)          | 54 (5)          | 26 (4)          | 3 (4)           | 1 (5)           | -23 (6)         |
| C22  | 44 (6)          | 45 (4)          | 20 (4)          | 5 (3)           | -5 (4)          | -17 (4)         |
| C23  | 26 (5)          | 30 (4)          | 18 (3)          | 1 (3)           | -7 (3)          | -3 (4)          |
| C24  | 14 (5)          | 20 (3)          | 16 (3)          | 3 (2)           | -4 (3)          | 0 (3)           |
| C25  | 15 (5)          | 17 (3)          | 32 (4)          | 7 (3)           | -3 (3)          | -6 (3)          |
| C26  | 18 (5)          | 17 (3)          | 28 (4)          | 1 (3)           | -9 (3)          | -8 (3)          |
| C27  | 12 (5)          | 17 (3)          | 32 (4)          | 1 (3)           | -3 (3)          | -5 (3)          |
| C28  | 10 (5)          | 17 (3)          | 20 (3)          | 5 (3)           | -5 (3)          | -3 (3)          |
| C29  | 22 (5)          | 19 (3)          | 24 (4)          | -3 (3)          | -7 (3)          | -8 (3)          |
| C30  | 17 (5)          | 21 (3)          | 27 (4)          | -1 (3)          | -9 (3)          | 0 (3)           |
| C31  | 30 (6)          | 15 (3)          | 37 (4)          | 3 (3)           | -4 (4)          | -5 (3)          |
| C32  | 23 (5)          | 18 (3)          | 37 (4)          | 3 (3)           | -6 (4)          | -2 (3)          |
| C33  | 24 (5)          | 23 (3)          | 32 (4)          | -9 (3)          | -13 (4)         | -5 (3)          |
| C34  | 32 (6)          | 23 (3)          | 27 (4)          | -1 (3)          | -6 (4)          | -7 (3)          |
| C35  | 14 (5)          | 11 (3)          | 21 (3)          | 3 (2)           | -6 (3)          | 1 (3)           |
| C36  | 17 (5)          | 18 (3)          | 24 (4)          | 4 (3)           | -4 (3)          | -4 (3)          |
| C37  | 33 (6)          | 18 (3)          | 31 (4)          | 6 (3)           | -4 (4)          | -9 (3)          |
| C38  | 26 (5)          | 19 (3)          | 28 (4)          | 9 (3)           | -4 (4)          | -6 (3)          |
| C39  | 25 (5)          | 19 (3)          | 26 (4)          | 7 (3)           | 4 (4)           | -1 (3)          |
| C40  | 43 (6)          | 20 (3)          | 27 (4)          | 1 (3)           | -2 (4)          | -9 (4)          |
| C41  | 125 (12)        | 42 (5)          | 41 (5)          | 0 (4)           | -19 (6)         | 35 (6)          |
| Cl1  | 71 (2)          | 36.7 (11)       | 57.1 (14)       | -4.5 (9)        | -14.8 (14)      | 0.2 (12)        |
| Cl2  | 84 (2)          | 40.4 (11)       | 34.4 (11)       | 8.7 (8)         | -1.9 (12)       | -19.3 (12)      |
| N1   | 25 (4)          | 17 (3)          | 19 (3)          | 0 (2)           | -1 (3)          | -4 (3)          |
| N2   | 19 (4)          | 19 (3)          | 31 (3)          | 1 (2)           | -7 (3)          | 0 (3)           |
| N3   | 75 (7)          | 27 (3)          | 37 (4)          | 7 (3)           | -7 (4)          | -20 (4)         |
| N4   | 16 (4)          | 16 (3)          | 26 (3)          | -2 (2)          | -6 (3)          | -10 (3)         |

| <b>Atom</b> | <b>U<sub>11</sub></b> | <b>U<sub>22</sub></b> | <b>U<sub>33</sub></b> | <b>U<sub>23</sub></b> | <b>U<sub>13</sub></b> | <b>U<sub>12</sub></b> |
|-------------|-----------------------|-----------------------|-----------------------|-----------------------|-----------------------|-----------------------|
| N5          | 20 (4)                | 22 (3)                | 21 (3)                | 5 (2)                 | -3 (3)                | -7 (3)                |
| N6          | 73 (7)                | 38 (4)                | 25 (4)                | 6 (3)                 | -10 (4)               | -11 (4)               |
| O1          | 44 (4)                | 21 (2)                | 28 (3)                | -2 (2)                | -3 (3)                | -12 (3)               |
| O2          | 33 (4)                | 15 (2)                | 25 (3)                | 5.2 (19)              | -7 (3)                | -11 (2)               |
| O3          | 61 (5)                | 25 (3)                | 34 (3)                | 10 (2)                | 1 (3)                 | -19 (3)               |
| O4          | 42 (4)                | 33 (3)                | 19 (3)                | 0 (2)                 | -4 (3)                | -16 (3)               |
| Pt1         | 22.6 (3)              | 15.01 (17)            | 20.72 (19)            | 3.64 (12)             | -2.91 (16)            | -3.72 (15)            |
| Pt2         | 18.7 (3)              | 15.86 (17)            | 17.50 (18)            | 1.60 (11)             | -3.63 (15)            | -4.14 (14)            |

**Table S18 Bond Lengths for 3\_yellow.**

| Atom | Atom | Length/Å   | Atom | Atom | Length/Å   |
|------|------|------------|------|------|------------|
| C1   | C2   | 1.505 (12) | C23  | O3   | 1.205 (8)  |
| C2   | O2   | 1.464 (8)  | C23  | O4   | 1.359 (9)  |
| C3   | C4   | 1.482 (9)  | C24  | C25  | 1.384 (10) |
| C3   | O1   | 1.201 (9)  | C24  | C29  | 1.417 (9)  |
| C3   | O2   | 1.350 (8)  | C25  | C26  | 1.402 (10) |
| C4   | C5   | 1.407 (10) | C26  | C27  | 1.394 (9)  |
| C4   | C9   | 1.404 (11) | C26  | C30  | 1.447 (10) |
| C5   | C6   | 1.374 (10) | C27  | C28  | 1.401 (10) |
| C6   | C7   | 1.399 (10) | C27  | Pt2  | 1.939 (7)  |
| C6   | C10  | 1.477 (8)  | C28  | C29  | 1.370 (9)  |
| C7   | C8   | 1.375 (9)  | C28  | C35  | 1.481 (8)  |
| C7   | Pt1  | 1.944 (6)  | C30  | C31  | 1.374 (10) |
| C8   | C9   | 1.396 (9)  | C30  | N4   | 1.382 (9)  |
| C8   | C15  | 1.482 (10) | C31  | C32  | 1.367 (11) |
| C10  | C11  | 1.386 (11) | C32  | C33  | 1.387 (10) |
| C10  | N1   | 1.364 (9)  | C33  | C34  | 1.367 (10) |
| C11  | C12  | 1.372 (10) | C34  | N4   | 1.346 (9)  |
| C12  | C13  | 1.373 (11) | C35  | C36  | 1.382 (10) |
| C13  | C14  | 1.399 (13) | C35  | N5   | 1.370 (9)  |
| C14  | N1   | 1.370 (9)  | C36  | C37  | 1.381 (9)  |
| C15  | C16  | 1.369 (10) | C37  | C38  | 1.387 (10) |
| C15  | N2   | 1.386 (8)  | C38  | C39  | 1.362 (11) |
| C16  | C17  | 1.377 (12) | C39  | N5   | 1.353 (8)  |
| C17  | C18  | 1.392 (9)  | C40  | N6   | 1.129 (10) |
| C18  | C19  | 1.368 (10) | C40  | Pt2  | 2.078 (8)  |
| C19  | N2   | 1.332 (10) | C41  | Cl1  | 1.763 (9)  |
| C20  | N3   | 1.119 (10) | C41  | Cl2  | 1.729 (11) |
| C20  | Pt1  | 2.089 (7)  | N1   | Pt1  | 2.022 (6)  |
| C21  | C22  | 1.508 (12) | N2   | Pt1  | 2.051 (6)  |
| C22  | O4   | 1.446 (8)  | N4   | Pt2  | 2.051 (6)  |
| C23  | C24  | 1.501 (9)  | N5   | Pt2  | 2.054 (6)  |

**Table S19 Bond Angles for 3\_yellow.**

| Atom | Atom | Atom | Angle/°   | Atom | Atom | Atom | Angle/°   |
|------|------|------|-----------|------|------|------|-----------|
| O2   | C2   | C1   | 107.3 (6) | C27  | C28  | C35  | 111.9 (6) |
| O1   | C3   | C4   | 125.0 (7) | C29  | C28  | C27  | 119.4 (6) |
| O1   | C3   | O2   | 123.8 (6) | C29  | C28  | C35  | 128.8 (7) |
| O2   | C3   | C4   | 111.2 (6) | C28  | C29  | C24  | 119.0 (7) |
| C5   | C4   | C3   | 118.2 (7) | C31  | C30  | C26  | 126.6 (7) |
| C9   | C4   | C3   | 121.3 (6) | C31  | C30  | N4   | 119.4 (7) |
| C9   | C4   | C5   | 120.5 (6) | N4   | C30  | C26  | 114.0 (6) |
| C6   | C5   | C4   | 120.3 (7) | C32  | C31  | C30  | 121.3 (7) |
| C5   | C6   | C7   | 118.2 (6) | C31  | C32  | C33  | 118.7 (7) |
| C5   | C6   | C10  | 129.8 (7) | C34  | C33  | C32  | 119.2 (7) |
| C7   | C6   | C10  | 111.9 (6) | N4   | C34  | C33  | 122.3 (7) |
| C6   | C7   | Pt1  | 118.4 (5) | C36  | C35  | C28  | 126.1 (6) |
| C8   | C7   | C6   | 122.9 (6) | N5   | C35  | C28  | 114.3 (6) |
| C8   | C7   | Pt1  | 118.6 (6) | N5   | C35  | C36  | 119.7 (6) |
| C7   | C8   | C9   | 119.0 (7) | C37  | C36  | C35  | 120.6 (7) |
| C7   | C8   | C15  | 113.0 (6) | C36  | C37  | C38  | 118.9 (7) |
| C9   | C8   | C15  | 128.0 (6) | C39  | C38  | C37  | 119.1 (6) |
| C8   | C9   | C4   | 119.1 (6) | N5   | C39  | C38  | 122.5 (7) |
| C11  | C10  | C6   | 125.1 (7) | N6   | C40  | Pt2  | 177.7 (8) |
| N1   | C10  | C6   | 113.7 (7) | Cl2  | C41  | Cl1  | 112.7 (6) |
| N1   | C10  | C11  | 121.2 (6) | C10  | N1   | C14  | 118.6 (6) |
| C12  | C11  | C10  | 119.5 (7) | C10  | N1   | Pt1  | 116.1 (4) |
| C13  | C12  | C11  | 120.7 (8) | C14  | N1   | Pt1  | 125.3 (5) |
| C12  | C13  | C14  | 118.3 (7) | C15  | N2   | Pt1  | 114.1 (5) |
| N1   | C14  | C13  | 121.6 (8) | C19  | N2   | C15  | 119.1 (6) |
| C16  | C15  | C8   | 125.8 (7) | C19  | N2   | Pt1  | 126.8 (5) |
| C16  | C15  | N2   | 120.3 (7) | C30  | N4   | Pt2  | 114.6 (5) |
| N2   | C15  | C8   | 113.8 (6) | C34  | N4   | C30  | 119.1 (6) |
| C15  | C16  | C17  | 119.5 (7) | C34  | N4   | Pt2  | 126.3 (5) |
| C16  | C17  | C18  | 120.3 (7) | C35  | N5   | Pt2  | 114.9 (4) |
| C19  | C18  | C17  | 117.8 (7) | C39  | N5   | C35  | 119.2 (6) |
| N2   | C19  | C18  | 123.0 (6) | C39  | N5   | Pt2  | 125.8 (5) |
| N3   | C20  | Pt1  | 176.0 (8) | C3   | O2   | C2   | 114.6 (6) |
| O4   | C22  | C21  | 105.5 (6) | C23  | O4   | C22  | 114.9 (6) |
| O3   | C23  | C24  | 123.5 (7) | C7   | Pt1  | C20  | 177.0 (3) |
| O3   | C23  | O4   | 123.7 (7) | C7   | Pt1  | N1   | 79.9 (3)  |
| O4   | C23  | C24  | 112.8 (6) | C7   | Pt1  | N2   | 80.4 (3)  |
| C25  | C24  | C23  | 117.7 (6) | N1   | Pt1  | C20  | 101.8 (3) |
| C25  | C24  | C29  | 121.3 (6) | N1   | Pt1  | N2   | 160.2 (2) |
| C29  | C24  | C23  | 121.0 (7) | N2   | Pt1  | C20  | 97.8 (3)  |
| C24  | C25  | C26  | 120.2 (6) | C27  | Pt2  | C40  | 176.1 (3) |
| C25  | C26  | C30  | 129.1 (6) | C27  | Pt2  | N4   | 79.7 (3)  |
| C27  | C26  | C25  | 117.6 (7) | C27  | Pt2  | N5   | 80.0 (3)  |
| C27  | C26  | C30  | 113.3 (6) | N4   | Pt2  | C40  | 99.5 (3)  |
| C26  | C27  | C28  | 122.6 (7) | N4   | Pt2  | N5   | 159.7 (2) |
| C26  | C27  | Pt2  | 118.3 (6) | N5   | Pt2  | C40  | 100.8 (3) |
| C28  | C27  | Pt2  | 118.9 (5) |      |      |      |           |

**Table S20 Hydrogen Bonds for 3\_yellow.**

| D   | H    | A                | d(D-H)/Å | d(H-A)/Å | d(D-A)/Å   | D-H-A <sup>o</sup> |
|-----|------|------------------|----------|----------|------------|--------------------|
| C13 | H13  | C12 <sup>1</sup> | 0.95     | 2.81     | 3.469 (9)  | 127.6              |
| C13 | H13  | O3 <sup>2</sup>  | 0.95     | 2.46     | 3.221 (9)  | 137.5              |
| C18 | H18  | N6 <sup>3</sup>  | 0.95     | 2.57     | 3.449 (12) | 153.8              |
| C31 | H31  | C12 <sup>4</sup> | 0.95     | 2.82     | 3.759 (8)  | 170.0              |
| C41 | H41A | N3 <sup>5</sup>  | 0.99     | 2.59     | 3.493 (16) | 152.5              |

<sup>1</sup>1-X,1-Y,-Z; <sup>2</sup>1-X,2-Y,-Z; <sup>3</sup>1-X,2-Y,1-Z; <sup>4</sup>+X,1+Y,+Z; <sup>5</sup>1+X,-1+Y,+Z



**Table S21 Torsion Angles for 3\_yellow.**

| A   | B   | C   | D   | Angle/°    | A   | B   | C   | D   | Angle/°    |
|-----|-----|-----|-----|------------|-----|-----|-----|-----|------------|
| C1  | C2  | O2  | C3  | -179.2 (7) | C25 | C26 | C30 | C31 | 1.4 (14)   |
| C3  | C4  | C5  | C6  | 178.3 (7)  | C25 | C26 | C30 | N4  | -178.4 (8) |
| C3  | C4  | C9  | C8  | -178.9 (7) | C26 | C27 | C28 | C29 | -1.0 (12)  |
| C4  | C3  | O2  | C2  | 178.3 (6)  | C26 | C27 | C28 | C35 | 179.0 (7)  |
| C4  | C5  | C6  | C7  | 1.3 (11)   | C26 | C30 | C31 | C32 | -179.5 (8) |
| C4  | C5  | C6  | C10 | 177.4 (8)  | C26 | C30 | N4  | C34 | -179.5 (7) |
| C5  | C4  | C9  | C8  | 0.9 (12)   | C26 | C30 | N4  | Pt2 | -0.2 (8)   |
| C5  | C6  | C7  | C8  | -0.5 (11)  | C27 | C26 | C30 | C31 | -177.5 (8) |
| C5  | C6  | C7  | Pt1 | 177.6 (6)  | C27 | C26 | C30 | N4  | 2.7 (10)   |
| C5  | C6  | C10 | C11 | 0.2 (13)   | C27 | C28 | C29 | C24 | 1.3 (11)   |
| C5  | C6  | C10 | N1  | -178.0 (8) | C27 | C28 | C35 | C36 | 178.1 (7)  |
| C6  | C7  | C8  | C9  | -0.1 (11)  | C27 | C28 | C35 | N5  | -2.7 (9)   |
| C6  | C7  | C8  | C15 | 178.2 (7)  | C28 | C35 | C36 | C37 | -179.1 (7) |
| C6  | C10 | C11 | C12 | -179.2 (8) | C28 | C35 | N5  | C39 | 179.1 (6)  |
| C6  | C10 | N1  | C14 | -180.0 (7) | C28 | C35 | N5  | Pt2 | 1.0 (8)    |
| C6  | C10 | N1  | Pt1 | 1.8 (8)    | C29 | C24 | C25 | C26 | 2.0 (12)   |
| C7  | C6  | C10 | C11 | 176.4 (8)  | C29 | C28 | C35 | C36 | -1.8 (13)  |
| C7  | C6  | C10 | N1  | -1.7 (9)   | C29 | C28 | C35 | N5  | 177.4 (7)  |
| C7  | C8  | C9  | C4  | -0.1 (11)  | C30 | C26 | C27 | C28 | -179.8 (7) |
| C7  | C8  | C15 | C16 | -177.1 (8) | C30 | C26 | C27 | Pt2 | -4.1 (9)   |
| C7  | C8  | C15 | N2  | -0.1 (9)   | C30 | C31 | C32 | C33 | -2.2 (13)  |
| C8  | C15 | C16 | C17 | 177.5 (7)  | C31 | C30 | N4  | C34 | 0.7 (11)   |
| C8  | C15 | N2  | C19 | -179.7 (7) | C31 | C30 | N4  | Pt2 | 179.9 (6)  |
| C8  | C15 | N2  | Pt1 | 0.1 (8)    | C31 | C32 | C33 | C34 | 3.1 (12)   |
| C9  | C4  | C5  | C6  | -1.5 (12)  | C32 | C33 | C34 | N4  | -2.1 (13)  |
| C9  | C8  | C15 | C16 | 1.0 (13)   | C33 | C34 | N4  | C30 | 0.2 (12)   |
| C9  | C8  | C15 | N2  | 178.0 (7)  | C33 | C34 | N4  | Pt2 | -178.9 (6) |
| C10 | C6  | C7  | C8  | -177.2 (7) | C35 | C28 | C29 | C24 | -178.7 (7) |
| C10 | C6  | C7  | Pt1 | 0.8 (8)    | C35 | C36 | C37 | C38 | -1.0 (12)  |
| C10 | C11 | C12 | C13 | -1.3 (14)  | C36 | C35 | N5  | C39 | -1.6 (10)  |
| C11 | C10 | N1  | C14 | 1.8 (11)   | C36 | C35 | N5  | Pt2 | -179.7 (5) |
| C11 | C10 | N1  | Pt1 | -176.4 (6) | C36 | C37 | C38 | C39 | 0.1 (12)   |
| C11 | C12 | C13 | C14 | 3.1 (15)   | C37 | C38 | C39 | N5  | 0.0 (12)   |
| C12 | C13 | C14 | N1  | -2.5 (15)  | C38 | C39 | N5  | C35 | 0.8 (11)   |
| C13 | C14 | N1  | C10 | 0.1 (13)   | C38 | C39 | N5  | Pt2 | 178.7 (6)  |
| C13 | C14 | N1  | Pt1 | 178.1 (7)  | N1  | C10 | C11 | C12 | -1.2 (12)  |
| C15 | C8  | C9  | C4  | -178.2 (7) | N2  | C15 | C16 | C17 | 0.7 (12)   |
| C15 | C16 | C17 | C18 | 0.6 (13)   | N4  | C30 | C31 | C32 | 0.4 (12)   |
| C16 | C15 | N2  | C19 | -2.5 (11)  | N5  | C35 | C36 | C37 | 1.8 (11)   |
| C16 | C15 | N2  | Pt1 | 177.2 (6)  | O1  | C3  | C4  | C5  | -3.1 (12)  |
| C16 | C17 | C18 | C19 | 0.0 (12)   | O1  | C3  | C4  | C9  | 176.7 (8)  |
| C17 | C18 | C19 | N2  | -1.9 (12)  | O1  | C3  | O2  | C2  | -2.0 (11)  |
| C18 | C19 | N2  | C15 | 3.2 (12)   | O2  | C3  | C4  | C5  | 176.6 (7)  |
| C18 | C19 | N2  | Pt1 | -176.5 (6) | O2  | C3  | C4  | C9  | -3.5 (10)  |
| C21 | C22 | O4  | C23 | 177.4 (8)  | O3  | C23 | C24 | C25 | -6.2 (12)  |
| C23 | C24 | C25 | C26 | -177.5 (7) | O3  | C23 | C24 | C29 | 174.4 (8)  |
| C23 | C24 | C29 | C28 | 177.6 (7)  | O3  | C23 | O4  | C22 | 0.4 (12)   |
| C24 | C23 | O4  | C22 | 179.8 (7)  | O4  | C23 | C24 | C25 | 174.5 (7)  |
| C24 | C25 | C26 | C27 | -1.6 (11)  | O4  | C23 | C24 | C29 | -5.0 (11)  |
| C24 | C25 | C26 | C30 | 179.6 (8)  | Pt1 | C7  | C8  | C9  | -178.1 (5) |

| <b>A</b> | <b>B</b> | <b>C</b> | <b>D</b> | <b>Angle/°</b> | <b>A</b> | <b>B</b> | <b>C</b> | <b>D</b> | <b>Angle/°</b> |
|----------|----------|----------|----------|----------------|----------|----------|----------|----------|----------------|
| C25      | C24      | C29      | C28      | -1.9 (12)      | Pt1      | C7       | C8       | C15      | 0.2 (9)        |
| C25      | C26      | C27      | C28      | 1.1 (11)       | Pt2      | C27      | C28      | C29      | -176.7 (6)     |
| C25      | C26      | C27      | Pt2      | 176.8 (6)      | Pt2      | C27      | C28      | C35      | 3.3 (9)        |

**Table S22 Hydrogen Atom Coordinates  
( $\text{\AA}\times 10^4$ ) and Isotropic Displacement  
Parameters ( $\text{\AA}^2\times 10^3$ ) for 3\_yellow.**

| <b>Atom</b> | <b>x</b> | <b>y</b> | <b>z</b> | <b>U(eq)</b> |
|-------------|----------|----------|----------|--------------|
| H1A         | 47       | 3778     | 4924     | 69           |
| H1B         | -1836    | 3173     | 4990     | 69           |
| H1C         | -1908    | 4557     | 4935     | 69           |
| H2A         | -344     | 3109     | 3963     | 31           |
| H2B         | -2465    | 3672     | 3987     | 31           |
| H5          | 78       | 5724     | 2103     | 24           |
| H9          | 162      | 6809     | 3857     | 25           |
| H11         | 728      | 6336     | 1041     | 31           |
| H12         | 1446     | 7121     | 72       | 41           |
| H13         | 2110     | 9041     | -45      | 40           |
| H14         | 2326     | 10103    | 838      | 31           |
| H16         | 877      | 8433     | 4421     | 35           |
| H17         | 1712     | 10082    | 4863     | 31           |
| H18         | 2517     | 11669    | 4234     | 30           |
| H19         | 2429     | 11548    | 3182     | 30           |
| H21A        | 7530     | 5625     | -323     | 77           |
| H21B        | 6572     | 6203     | -914     | 77           |
| H21C        | 5324     | 5906     | -307     | 77           |
| H22A        | 7906     | 7608     | -350     | 42           |
| H22B        | 5712     | 7934     | -396     | 42           |
| H25         | 6881     | 9682     | 1595     | 26           |
| H29         | 5466     | 6402     | 1433     | 25           |
| H31         | 7235     | 11081    | 2364     | 33           |
| H32         | 7639     | 12256    | 3169     | 31           |
| H33         | 7043     | 11565    | 4183     | 30           |
| H34         | 6357     | 9679     | 4355     | 32           |
| H36         | 4562     | 4739     | 2043     | 24           |
| H37         | 3711     | 3260     | 2725     | 32           |
| H38         | 3699     | 3532     | 3787     | 29           |
| H39         | 4494     | 5251     | 4131     | 29           |
| H41A        | 9870     | 3073     | 1732     | 86           |
| H41B        | 7695     | 3197     | 1923     | 86           |

## Figures

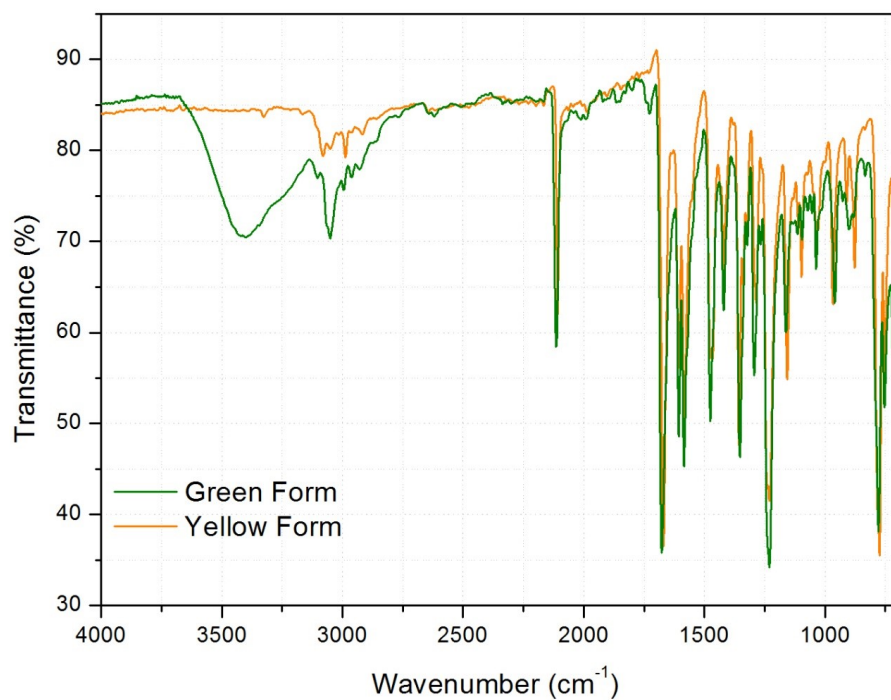

**Figure S1.** Solid-State IR spectroscopy for **2** in both green form-I and yellow form-II.

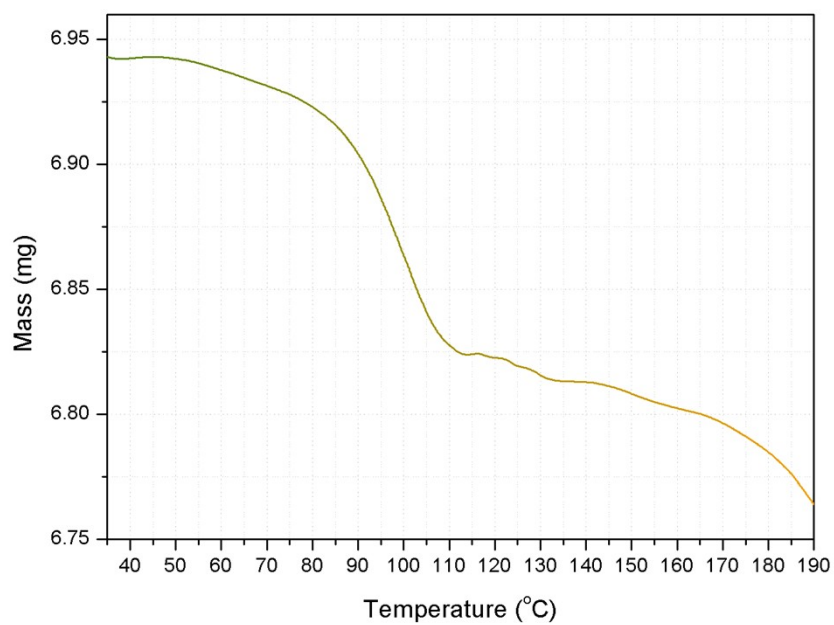

**Figure S2.** Thermogravimetric analysis of **2** showing a two-step loss of 3.45% mass.

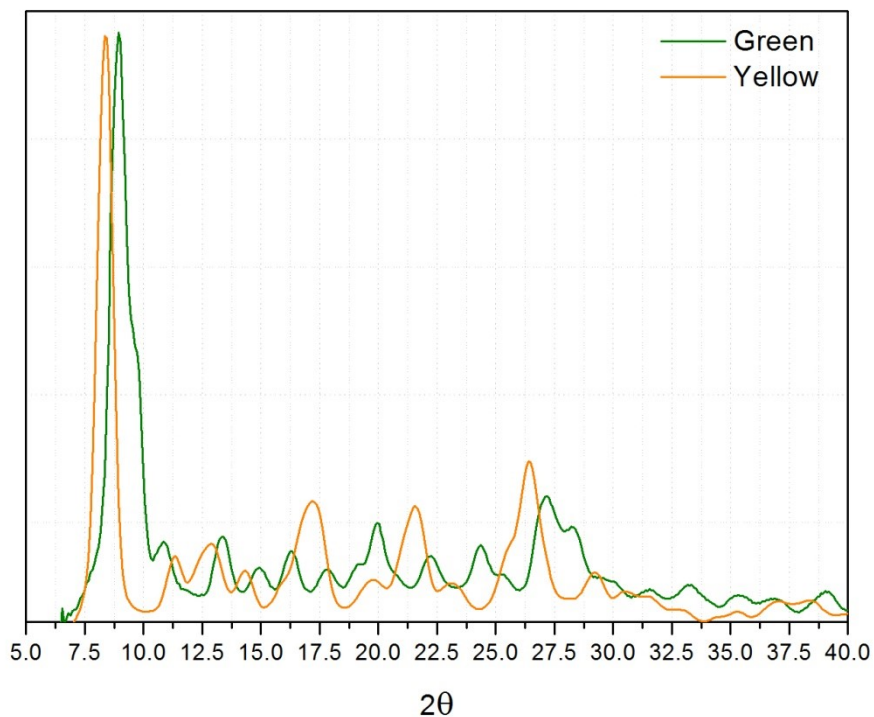

**Figure S3.** X-ray powder diffraction experiment of **2** before heating (form-I) and after heating (form-II).

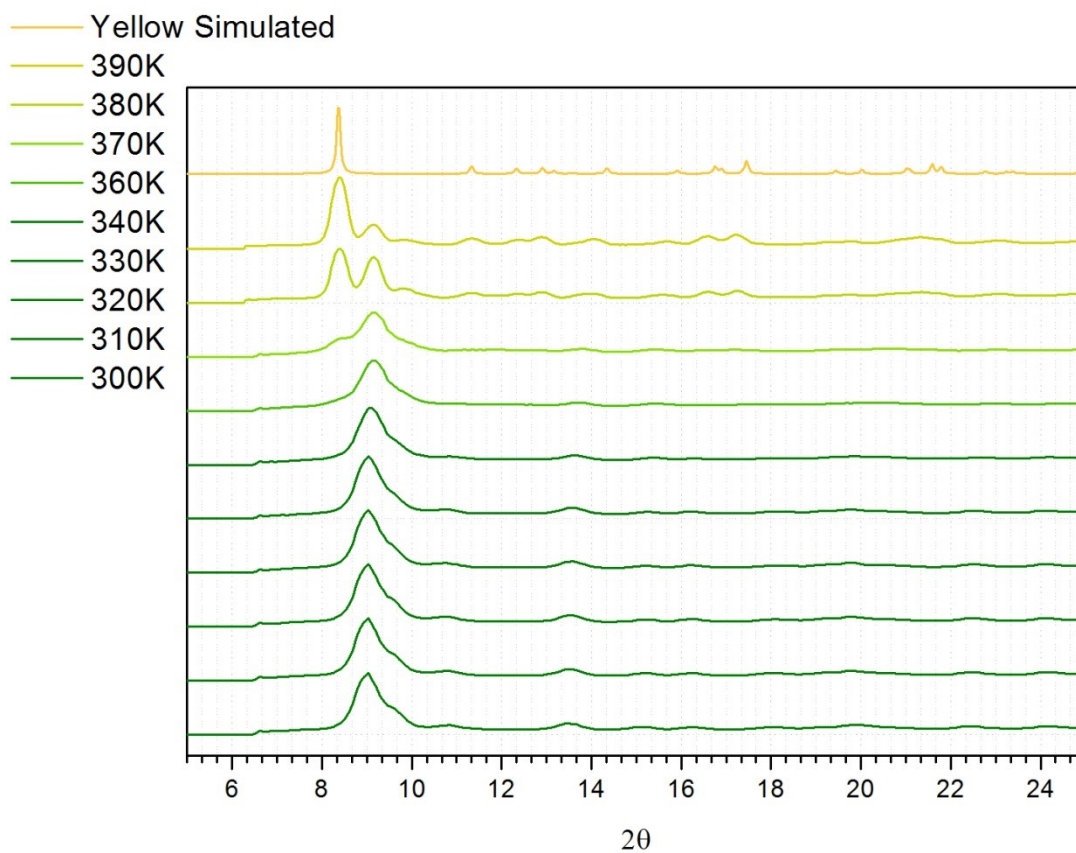

**Figure S4.** Powder diffraction patterns for **2** run at increasing cryostat temperature intervals, indicating a crystalline transition between the yellow and green forms at high temperatures.

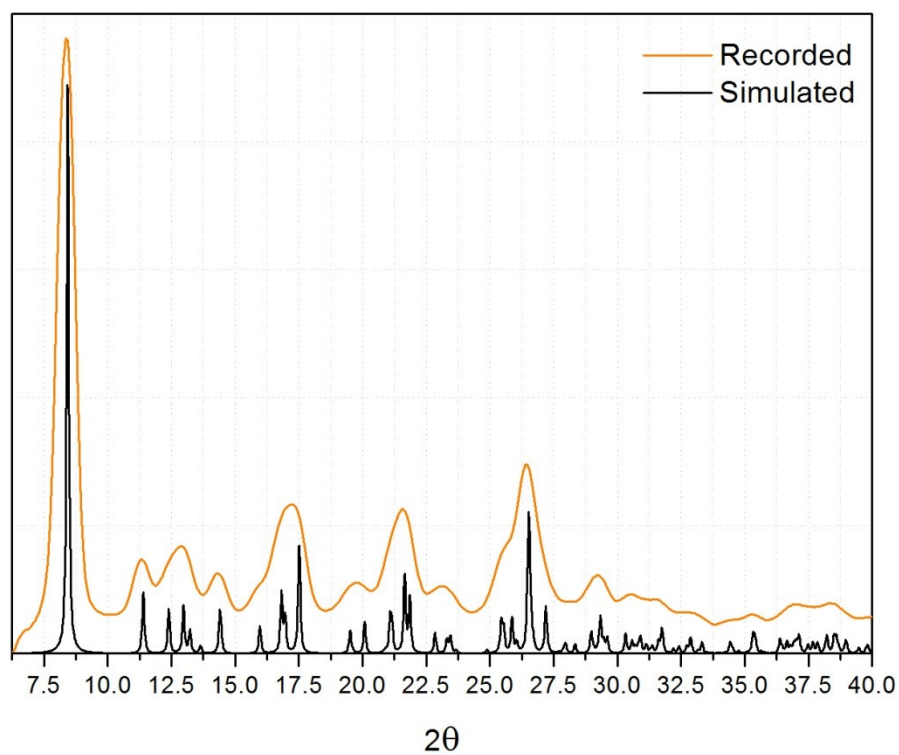

**Figure S5.** Comparison of the recorded powder pattern for **2** after heating (form-II) and the simulated powder pattern from the yellow crystals grown.

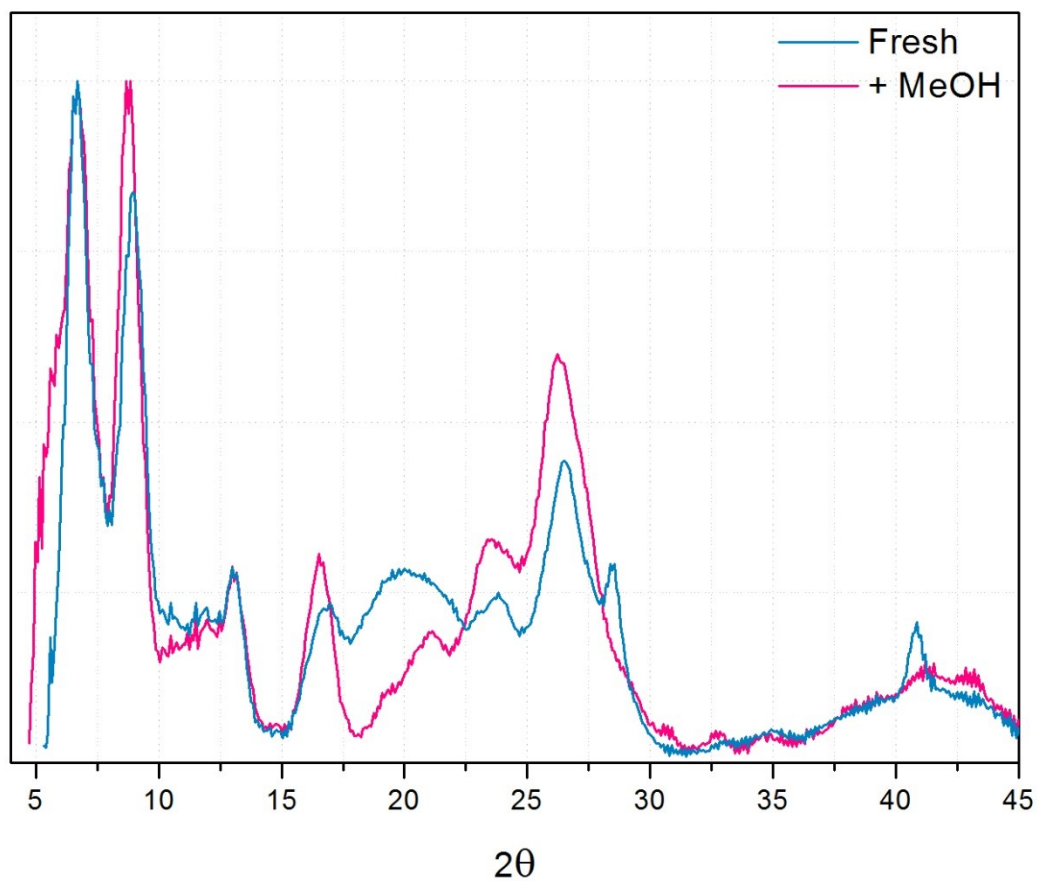

**Figure S6.** Powder diffraction of **4** before and after methanol exposure.

## References

1. J. A. G. Williams, A. Beeby, E. S. Davies, J. A. Weinstein and C. Wilson, *Inorg. Chem.*, 2003, **42**, 8609
